# Supplementary material
Source: MDPI journal article supplement (https://www.mdpi.com/2073-4344/12/7/679)
Supplement: s1 [file s1 › catalysts-1751477-supplementary.pdf]

## Supplementary Information for:

# Cobalt-Based Metal–Organic Framework Nanoparticles with Peroxidase-like Catalytic Activity for Sensitive Colorimetric Detection of Phosphate

Zhichen Deng <sup>1</sup>, Huifeng Zhang <sup>1</sup>, Ping Yuan <sup>1</sup>, Zhengquan Su <sup>2</sup>, Yan Bai <sup>1</sup>, Zhina Yin <sup>1,\*</sup> and Jincan He <sup>1,\*</sup>

<sup>1</sup> Guangdong Engineering Research Center of Public Health Detection and Assessment, Guangdong Pharmaceutical University, Guangzhou 510310, China; ggiottodeng@163.com (Z.D.); 13715060054@163.com (H.Z.); y18883851784@163.com (P.Y.); angell\_bai@163.com (Y.B.)

<sup>2</sup> Guangdong Engineering Research Center of Natural Products and New Drugs, Guangdong Provincial University Engineering Technology Research Center of Natural Products and Drugs, Guangdong Pharmaceutical University, Guangzhou 510006, China; suzhq@scnu.edu.cn

\* Correspondence: yinzhina@gdpu.edu.cn (Z.Y.); hejincan@gdpu.edu.cn (J.H.); Tel.: +86-20-34055161 (J.H.); Fax: +86-20-34055355 (J.H.)

## Figure captions

**Figure S1.** Co-MOF prepared with different 2-methylimidazole/cobalt salt mole ratio for catalytic oxidizing TMB in presence of H<sub>2</sub>O<sub>2</sub>. The absorbance was obtained at 652 nm.

**Figure S2.** The SEM images of Co-MOF prepared with 2-methylimidazole/cobalt salt mole ratio of 240: 10 (a), and 640: 10 (b).

**Figure S3.** The XPS spectra of Co-MOF for Co 2p.

**Figure S4.** The EDS spectrum (a) and nitrogen adsorption and desorption isotherms (b) of Co-MOF.

**Figure S5.** The absorbance changes of TMB-H<sub>2</sub>O<sub>2</sub> system catalyzed with different concentrations of substance (a). Time dependent absorbance change of Co-MOF and leaching solution-involved TMB-H<sub>2</sub>O<sub>2</sub> catalytic system (b). The absorbance was measured at 652 nm.

**Figure S6.** The conditions of reaction pH (a), reaction temperature (b), TMB concentration (c),

TMB adding volume (d) on the catalytic activity of Co-MOF.

**Figure S7.** The conditions of H<sub>2</sub>O<sub>2</sub> volume (a), Co-MOF concentration (b), time (c) on the catalytic activity of Co-MOF, and the catalytic stability of Co-MOF for 16 storage days (d).

**Figure S8.** The FT-IR spectra of Co-MOF after addition of Pi (a), the XPS pattern of Co-MOF after addition of Pi (b), the XPS pattern of Co 2p in Co-MOF with and without Pi addition (c), and the XPS pattern of O 1s in Co-MOF with and without Pi addition (d).

**Figure S9.** Zeta potential value of Co-MOF with and without the addition of Pi.

**Figure S10.** The ESR spectra of Co-MOF before and after adding Pi. (25 mM DMPO was added.)

### Table captions

**Table S1.** The BET parameters of Co-MOF.

**Table S2.** Comparison of the apparent Michaelis-Menten constant ( $K_m$ ), maximum reaction rate ( $V_{max}$ ) of Co-MOF with other reported substance or nanomaterials.

**Table S3.** Comparison of the proposed method with other nanomaterials-related methods for Pi determination.

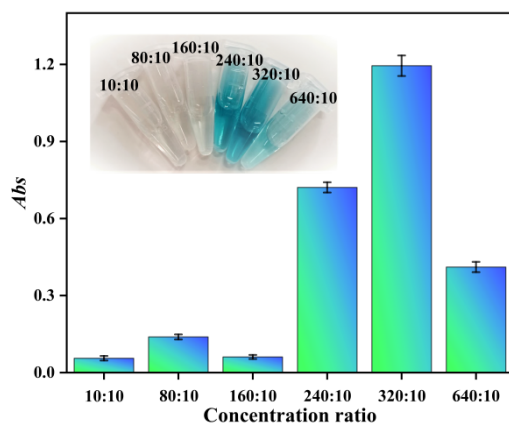

**Figure S1.** Co-MOF prepared with different 2-methylimidazole/cobalt salt mole ratio for catalytic oxidizing TMB in presence of  $H_2O_2$ . The absorbance was obtained at 652 nm.

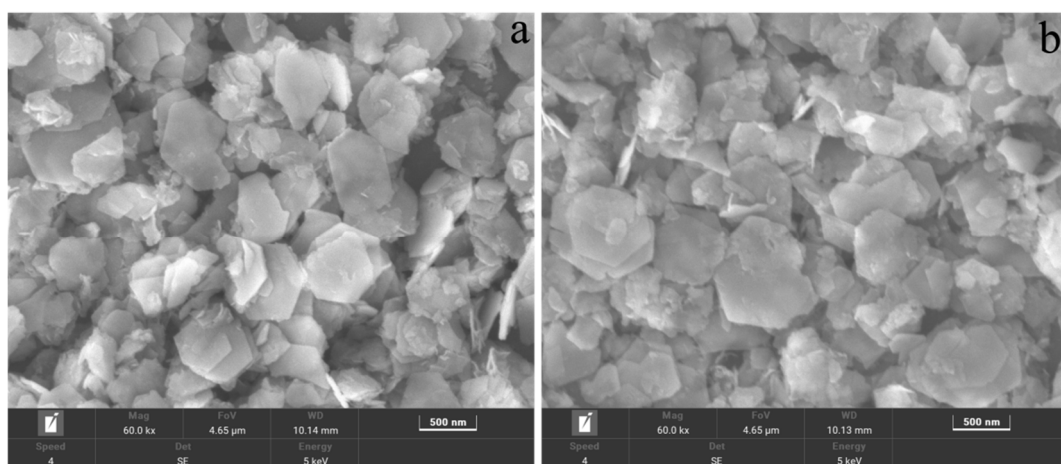

**Figure S2.** The SEM images of Co-MOF prepared with 2-methylimidazole/cobalt salt mole ratio of 240: 10 (a), and 640: 10 (b).

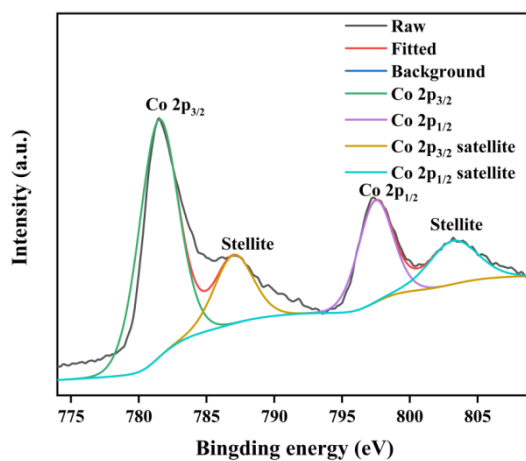

**Figure S3.** The XPS spectra of Co-MOF for Co 2p.

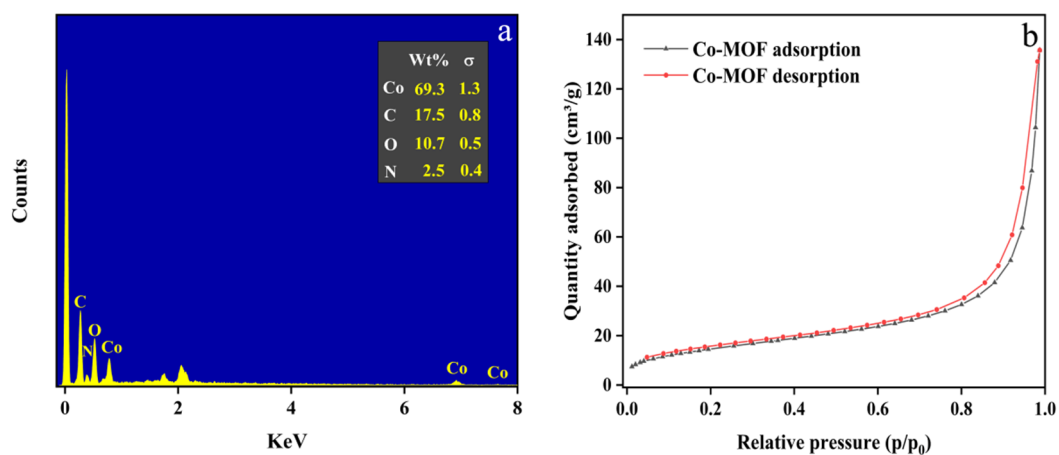

**Figure S4.** The EDS spectrum (a) and nitrogen adsorption and desorption isotherms (b) of

Co-MOF.

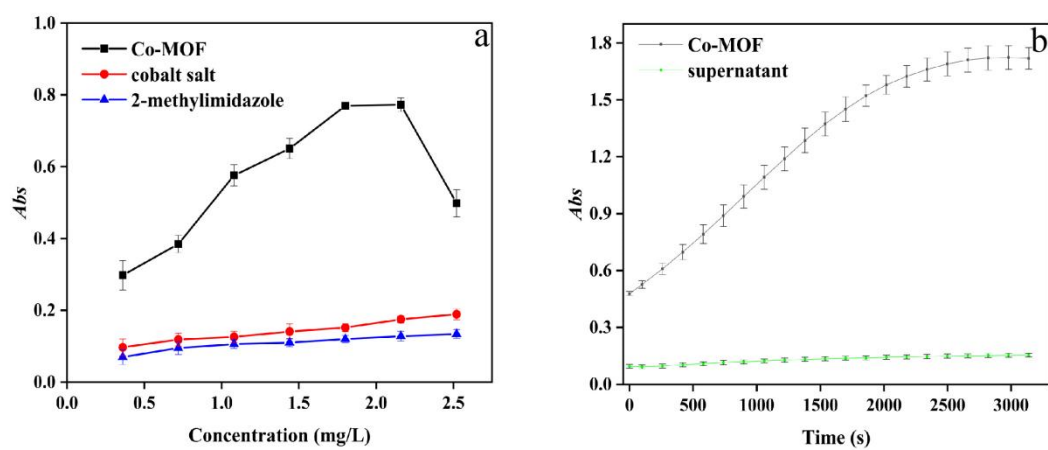

**Figure S5.** The absorbance changes of TMB- $\text{H}_2\text{O}_2$  system catalyzed with different concentrations of substance (a). Time dependent absorbance change of Co-MOF and leaching solution-involved TMB- $\text{H}_2\text{O}_2$  catalytic system (b). The absorbance was measured at 652 nm.

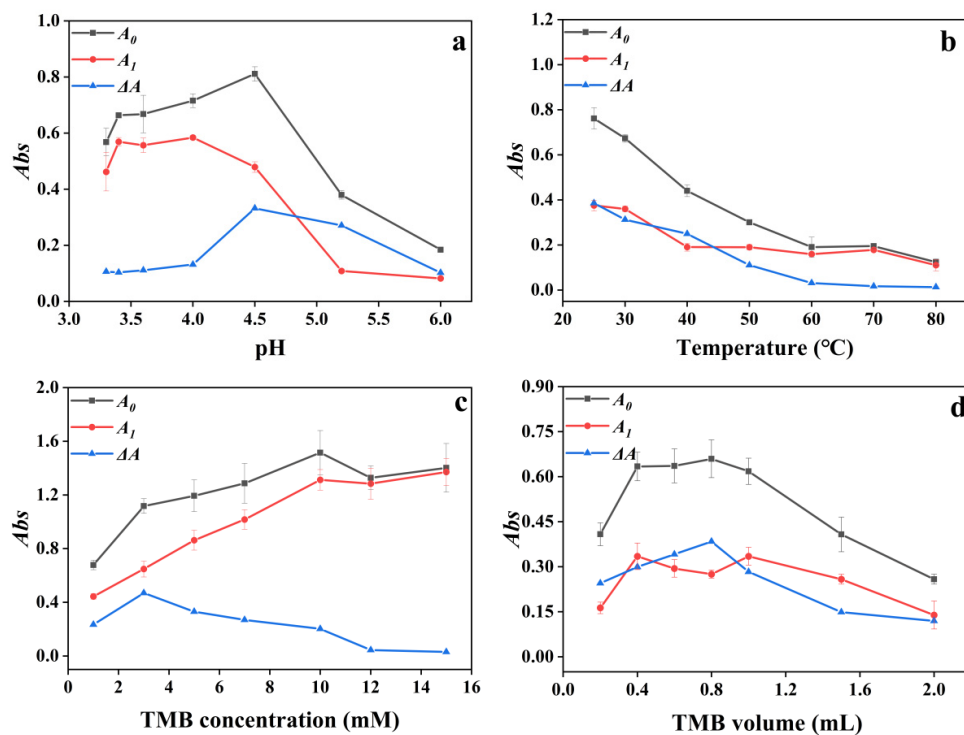

**Figure S6.** The conditions of reaction pH (a), reaction temperature (b), TMB concentration (c), TMB adding volume (d) on the catalytic activity of Co-MOF.

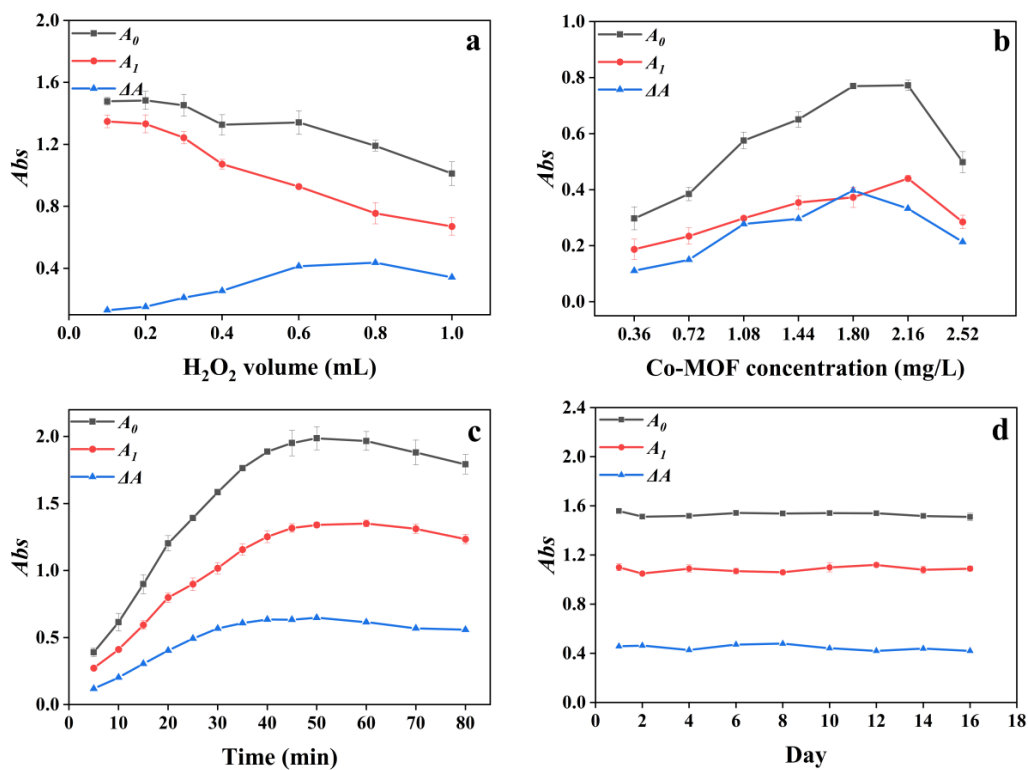

**Figure S7.** The conditions of  $H_2O_2$  volume (a), Co-MOF concentration (b), time (c) on the catalytic activity of Co-MOF, and the catalytic stability of Co-MOF for 16 storage days (d).

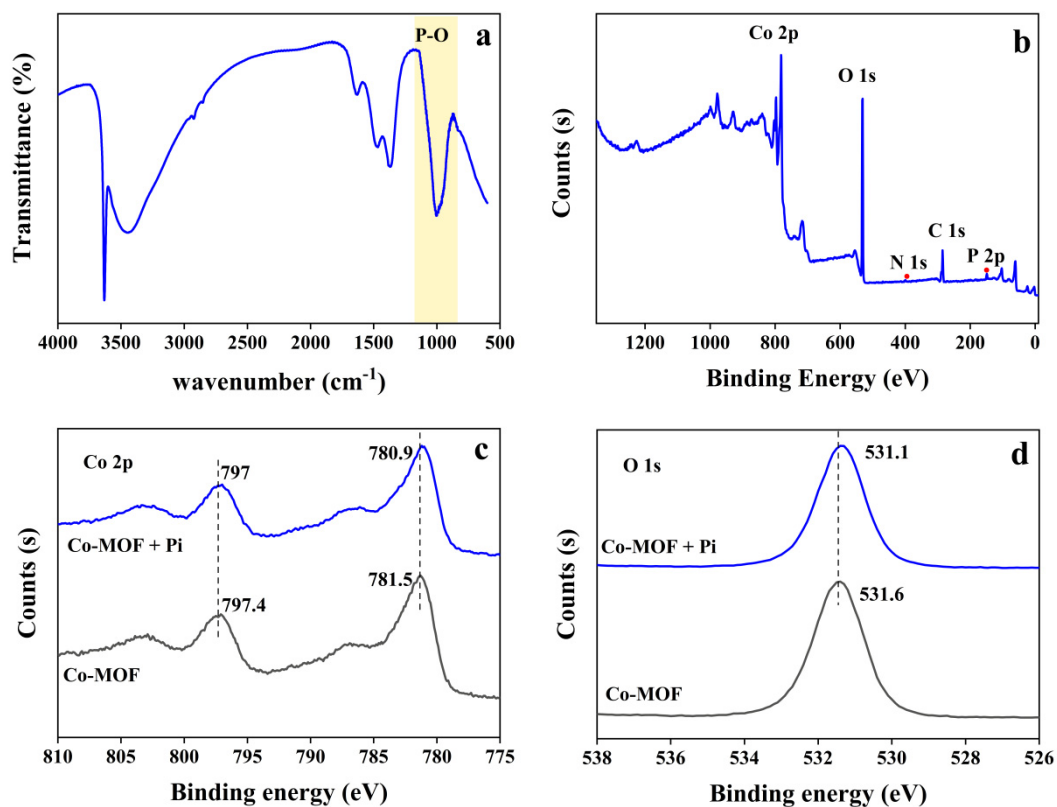

**Figure 8.** The FT-IR spectra of Co-MOF after addition of Pi (a), the XPS pattern of Co-MOF after addition of Pi (b), the XPS pattern of Co 2p in Co-MOF with and without Pi addition (c), and the XPS pattern of O 1s in Co-MOF with and without Pi addition (d).

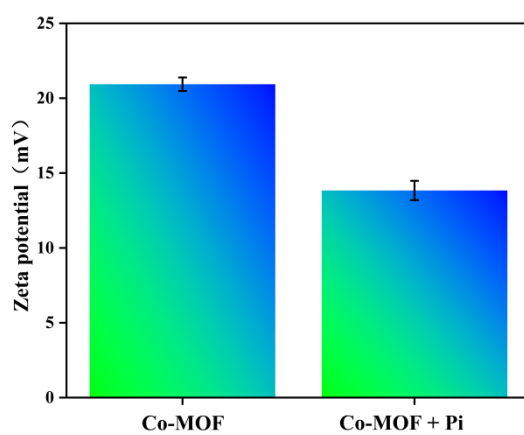

**Figure S9.** Zeta potential value of Co-MOF with and without the addition of Pi.

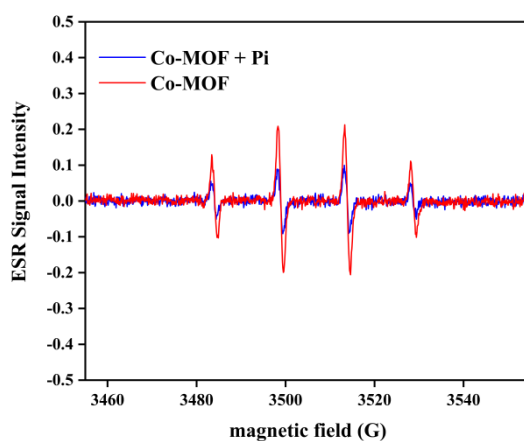

**Figure S10.** The ESR spectra of Co-MOF before and after adding Pi. (25 mM DMPO was added.)

**Table S1.** The BET parameters of Co-MOF.

| Nanomaterials | BET surface area (m <sup>2</sup> /g) | Total pore volume (cm <sup>3</sup> /g) | Average pore size (nm) |
|---------------|--------------------------------------|----------------------------------------|------------------------|
| Co-MOF        | 53.62                                | 0.1761                                 | 13.14                  |

**Table S2.** Comparison of the apparent Michaelis-Menten constant ( $K_m$ ), maximum reaction rate ( $V_{max}$ ) of Co-MOF with other reported substance or nanomaterials.

| Catalyst        | Substance                     | $K_m$ [mM] | $V_{max}$ [ $10^{-7}$ M s <sup>-1</sup> ] | Reference  |
|-----------------|-------------------------------|------------|-------------------------------------------|------------|
| Co-MOF          | TMB                           | 0.72       | 3.12                                      | This paper |
| Co-MOF          | H <sub>2</sub> O <sub>2</sub> | 0.20       | 4.23                                      | This paper |
| HRP             | TMB                           | 0.52       | 3.01                                      | This paper |
| HRP             | H <sub>2</sub> O <sub>2</sub> | 0.19       | 9.03                                      | This paper |
| MIL-53(Fe)      | TMB                           | 1.08       | 8.87                                      | [23]       |
| MIL-53 (Fe)     | H <sub>2</sub> O <sub>2</sub> | 0.04       | 4.3                                       | [23]       |
| Fe-Co alloy NPs | TMB                           | 1.79       | 4.56                                      | [24]       |
| Fe-Co alloy NPs | H <sub>2</sub> O <sub>2</sub> | 0.060      | 1.32                                      | [24]       |

**Table S3.** Comparison of the proposed method with other nanomaterials-related methods for Pi determination.

| Elements                                             | Method                     | Linear range ( $\mu\text{M}$ ) | Detection limit ( $\mu\text{M}$ ) | Reference  |
|------------------------------------------------------|----------------------------|--------------------------------|-----------------------------------|------------|
| MWCNTs-SH and AuNPs <sup>a</sup>                     | Square wave<br>voltammetry | 5.2-156.3                      | 3.1                               | [10]       |
| [Tb-EDTA] <sup>-1</sup> and Au NPs-CTAB <sup>b</sup> | fluorescence               | 6.30-750                       | 1.80                              | [30]       |
| Eu-ICP <sup>c</sup>                                  | fluorescence               | 2-100                          | 0.84                              | [31]       |
| PCN-224 <sup>d</sup>                                 | fluorescence               | 0-10                           | 0.054                             | [32]       |
| silver nanorods                                      | colorimetry                | 2-240                          | 0.076                             | [33]       |
| MA-AuNPs <sup>e</sup>                                | colorimetry                | 0.050-0.30                     | 0.076                             | [34]       |
| CUNPs <sup>f</sup>                                   | colorimetry                | 1.04-43.75                     | 0.75                              | [35]       |
| Co-MOF                                               | colorimetry                | 0.093-1.5*                     | 0.052*                            | This paper |

<sup>a</sup>MWCNTs-SH and AuNPs are abbreviated from silanized multi-walled carbon nanotubes and Au nanoparticles, respectively.

<sup>b</sup>[Tb-EDTA]<sup>-1</sup> and Au NPs-CTAB are abbreviated from luminescent probe and gold nanoparticles capped with a cetyltrimethylammonium bromide, respectively.

<sup>c</sup>Eu-ICP is abbreviated from europium-based infinite coordination polymer nanospheres.

<sup>d</sup>PCN-224 is abbreviated from a porphyrin-based nano metal-organic framework.

<sup>e</sup>MA-AuNPs is abbreviated from carboxylate group-modified anti-aggregation gold nanoparticles.

<sup>f</sup>CUNPs is abbreviated from curcumin nanoparticles.

\*The data was obtained by the transformation with molecular weight of Pi (96).
